# Supplementary material
Source: bioRxiv or medRxiv preprint supplement (https://medrxiv.org/highwire/filestream/89307/field_highwire_adjunct_files/0/2020.07.10.20150045-1.pdf)
Supplement: Supplementary file [file 2020.07.10.20150045-1.pdf]

## Supplementary Information

### Genomic epidemiology reveals multiple introductions and spread of SARS-CoV-2 in the Indian state of Karnataka

Chitra Pattabiraman<sup>1</sup>, Farhat Habib<sup>2</sup>, Harsha PK<sup>1</sup>, Risha Rasheed<sup>1</sup>, Vijayalakshmi Reddy<sup>1</sup>, Prameela Dinesh<sup>3</sup>, Tina Damodar<sup>1</sup>, Kiran Hosallimath<sup>1</sup>, Anson K George<sup>1</sup>, Nakka Vijay Kiran Reddy<sup>1</sup>, Banerjee John<sup>1</sup>, Amrita Pattanaik<sup>1</sup>, Narendra Kumar<sup>1</sup>, Reeta S Mani<sup>1</sup>, Manjunatha M Venkataswamy<sup>1</sup>, Shafeeq K Shahul Hameed<sup>1</sup>, Prakash Kumar B.G<sup>3</sup>, Anita Desai<sup>1</sup>, Ravi Vasanthapuram<sup>1</sup>

## Contents

Supplementary Table 1

Supplementary Figure 1-2

Supplementary Table 2-5

## Supplementary Table 1

| Supplementary Table 1: Ct value, coverage depth and breadth of SARS-CoV-2 genomes |          |          |             |              |                     |                           |
|-----------------------------------------------------------------------------------|----------|----------|-------------|--------------|---------------------|---------------------------|
| Sr. No                                                                            | Ct Value | kit      | Total Reads | Mapped Reads | % of genome covered | Average Depth of coverage |
| 1                                                                                 | 17.1     | ICMR-NIV | 274243      | 236503       | 99.8                | 2681                      |
| 2                                                                                 | 19.78    | ICMR-NIV | 257231      | 223629       | 99.8                | 2651                      |
| 3                                                                                 | 30.14    | A*Star   | 190178      | 139123       | 99.8                | 662                       |
| 4                                                                                 | 19.3     | ICMR-NIV | 252864      | 217195       | 99.3                | 2553                      |
| 5                                                                                 | 22.5     | Mylab    | 343163      | 295756       | 99.3                | 3637                      |
| 6                                                                                 | 22.64    | A*Star   | 90658       | 77036        | 99.2                | 1033                      |
| 7                                                                                 | 23.3     | Mylab    | 85694       | 72731        | 99.2                | 939                       |
| 8                                                                                 | 21.17    | A*Star   | 177961      | 152594       | 99.0                | 1798                      |
| 9                                                                                 | 22.31    | A*Star   | 122679      | 105577       | 98.9                | 1276                      |
| 10                                                                                | 27.28    | ICMR-NIV | 55714       | 43373        | 98.1                | 750                       |
| 11                                                                                | 20.1     | A*Star   | 868971      | 897046       | 99.9                | 1066.6                    |
| 12                                                                                | 20.43    | BGI      | 3,94,431    | 373374       | 99.9                | 4755                      |
| 13                                                                                | 21.32    | A*Star   | 171088      | 153235       | 99.9                | 2193                      |
| 14                                                                                | 23.88    | A*Star   | 2,31,800    | 222294       | 99.9                | 3092.3                    |
| 15                                                                                | 24.35    | A*Star   | 4,27,763    | 404509       | 99.9                | 6746                      |
| 16                                                                                | 24.65    | A*Star   | 139037      | 131752       | 99.9                | 2910.3                    |
| 17                                                                                | 25.82    | A*Star   | 337778      | 256837       | 99.9                | 3950                      |
| 18                                                                                | 21.02    | A*Star   | 372807      | 283520       | 99.8                | 3807.6                    |
| 19                                                                                | 21.86    | A*Star   | 251094      | 213959       | 99.8                | 2580                      |
| 20                                                                                | 23.1     | A*Star   | 110061      | 103481       | 99.8                | 1451.8                    |
| 21                                                                                | 23.7     | A*Star   | 213839      | 193264       | 99.8                | 2852.3                    |
| 22                                                                                | 25       | A*Star   | 147496      | 130336       | 99.8                | 1963.6                    |
| 23                                                                                | 25.13    | A*Star   | 387775      | 363643       | 99.8                | 7126                      |
| 24                                                                                | 25.86    | A*Star   | 691406      | 656607       | 99.8                | 11602                     |
| 25                                                                                | 26.38    | A*Star   | 4,10,206    | 385974       | 99.8                | 9568.5                    |
| 26                                                                                | 26.71    | A*Star   | 103092      | 93277        | 99.8                | 1634.5                    |
| 27                                                                                | 29.1     | A*Star   | 168480      | 151202       | 99.8                | 3528                      |
| 28                                                                                | 23.82    | A*Star   | 201647      | 171229       | 99.3                | 2463                      |
| 29                                                                                | 22.69    | A*Star   | 101884      | 86721        | 99.2                | 1214                      |
| 30                                                                                | 24.2     | A*Star   | 2,21,647    | 209359       | 99.2                | 3943.2                    |
| 31                                                                                | 26.7     | A*Star   | 439001      | 407218       | 99.2                | 10931                     |
| 32                                                                                | 31       | A*Star   | 1,22,573    | 105329       | 99                  | 5092.5                    |
| 33                                                                                | 20.45    | A*Star   | 93992       | 80541        | 98.9                | 1084                      |
| 34                                                                                | 26.59    | A*Star   | 113388      | 98515        | 98.8                | 1620.3                    |
| 35                                                                                | 27.6     | A*Star   | 43884       | 31697        | 98.8                | 472                       |
| 36                                                                                | 22.82    | A*Star   | 176354      | 168960       | 98.6                | 2572                      |
| 37                                                                                | 27.2     | A*Star   | 235096      | 224120       | 98.5                | 4741.3                    |
| 38                                                                                | 24.31    | A*Star   | 167748      | 139447       | 98.4                | 1884                      |
| 39                                                                                | 21.45    | A*Star   | 152005      | 129254       | 98.2                | 1867                      |
| 40                                                                                | 23.24    | A*Star   | 78932       | 78131        | 98.2                | 1198.2                    |
| 41                                                                                | 25.68    | A*Star   | 59579       | 50176        | 97.9                | 667                       |
| 42                                                                                | 27.1     | BGI      | 244455      | 112843       | 97.5                | 4161.3                    |
| 43                                                                                | 26.86    | A*Star   | 2,17,498    | 203880       | 97.4                | 3930.5                    |
| 44                                                                                | 28.32    | A*Star   | 74958       | 58662        | 97.3                | 902.62                    |
| 45                                                                                | 24.57    | A*Star   | 2,67,466    | 253685       | 96.9                | 5078.6                    |
| 46                                                                                | 27.39    | A*Star   | 83692       | 77535        | 96.9                | 1385.5                    |
| 47                                                                                | 26.47    | Altona   | 112288      | 105163       | 96.5                | 6009.9                    |
| 48                                                                                | 29.6     | A*Star   | 71,530      | 64110        | 94.9                | 911.7                     |
| 49                                                                                | 37.85    | A*Star   | 648341      | 46502        | 92.9                | 2299.1                    |
| 50                                                                                | 30.5     | A*Star   | 19297       | 8168         | 92.2                | 142.17                    |
| 51                                                                                | 30.2     | A*Star   | 7166        | 1957         | 89.9                | 19.56                     |
| 52                                                                                | 32.6     | A*Star   | 5766        | 1172         | 88                  | 11.56                     |
| 53                                                                                | 30.4     | A*Star   | 188366      | 165182       | 87.9                | 7434.6                    |
| 54                                                                                | 17.5     | BGI      | 330020      | 310965       | 87.8                | 6066                      |
| 55                                                                                | 31.96    | A*Star   | 145769      | 34295        | 83.7                | 1866.9                    |
| 56                                                                                | 23.2     | A*Star   | 1251        | 633          | 77.7                | 7.9                       |
| 57                                                                                | 30.3     | A*Star   | 52582       | 47882        | 76.2                | 1212                      |
| 58                                                                                | 37.68    | A*Star   | 91043       | 4535         | 71.9                | 229.9                     |
| 59                                                                                | 29.9     | A*Star   | 88861       | 79483        | 66.1                | 3949.7                    |

*Supplementary Table 1- Table describes data from sequencing of 60 COVID19 positive samples. Ct Values represent the results of RT-PCR with the indicated kits. Total reads is the total number of sequences obtained from each sample. Mapped reads represent the number of reads that aligned to the SARS-CoV-2 reference genome (NC\_045512). % of genome/breadth of coverage is the percentage of the reference genome covered by at least one read. Average depth of coverage is the average number of reads that cover each base of the genome. Samples for which genomes were not recovered are shaded in grey*

## Supplementary Figure 1

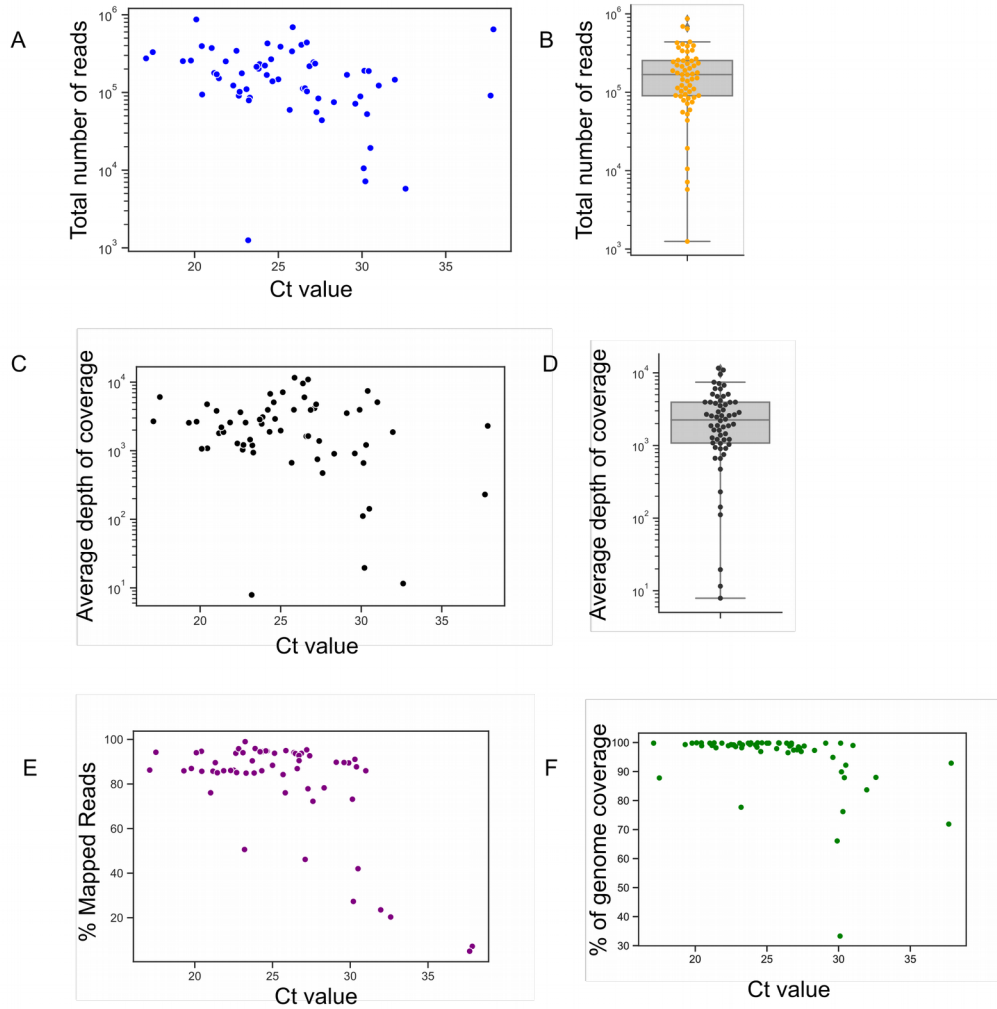

Supplementary Figure 1- Amplicon sequencing of SARS-CoV-2 genomes from PCR positive samples. Figure panels (A, C, E, F) show the relationship between Ct values from RT-PCR with total number of reads obtained from each sample, % of reads that mapped to the SARS-CoV-2 reference genome, average depth of sequencing across the genome and % of reference genome covered by at least one read (% genome coverage). Panel B and D show the spread of the total number of sequencing reads obtained from each sample and average number of reads per nucleotide base (average depth of coverage) respectively. Each point denotes a positive sample,  $n=60$ .

## Supplementary Figure 2

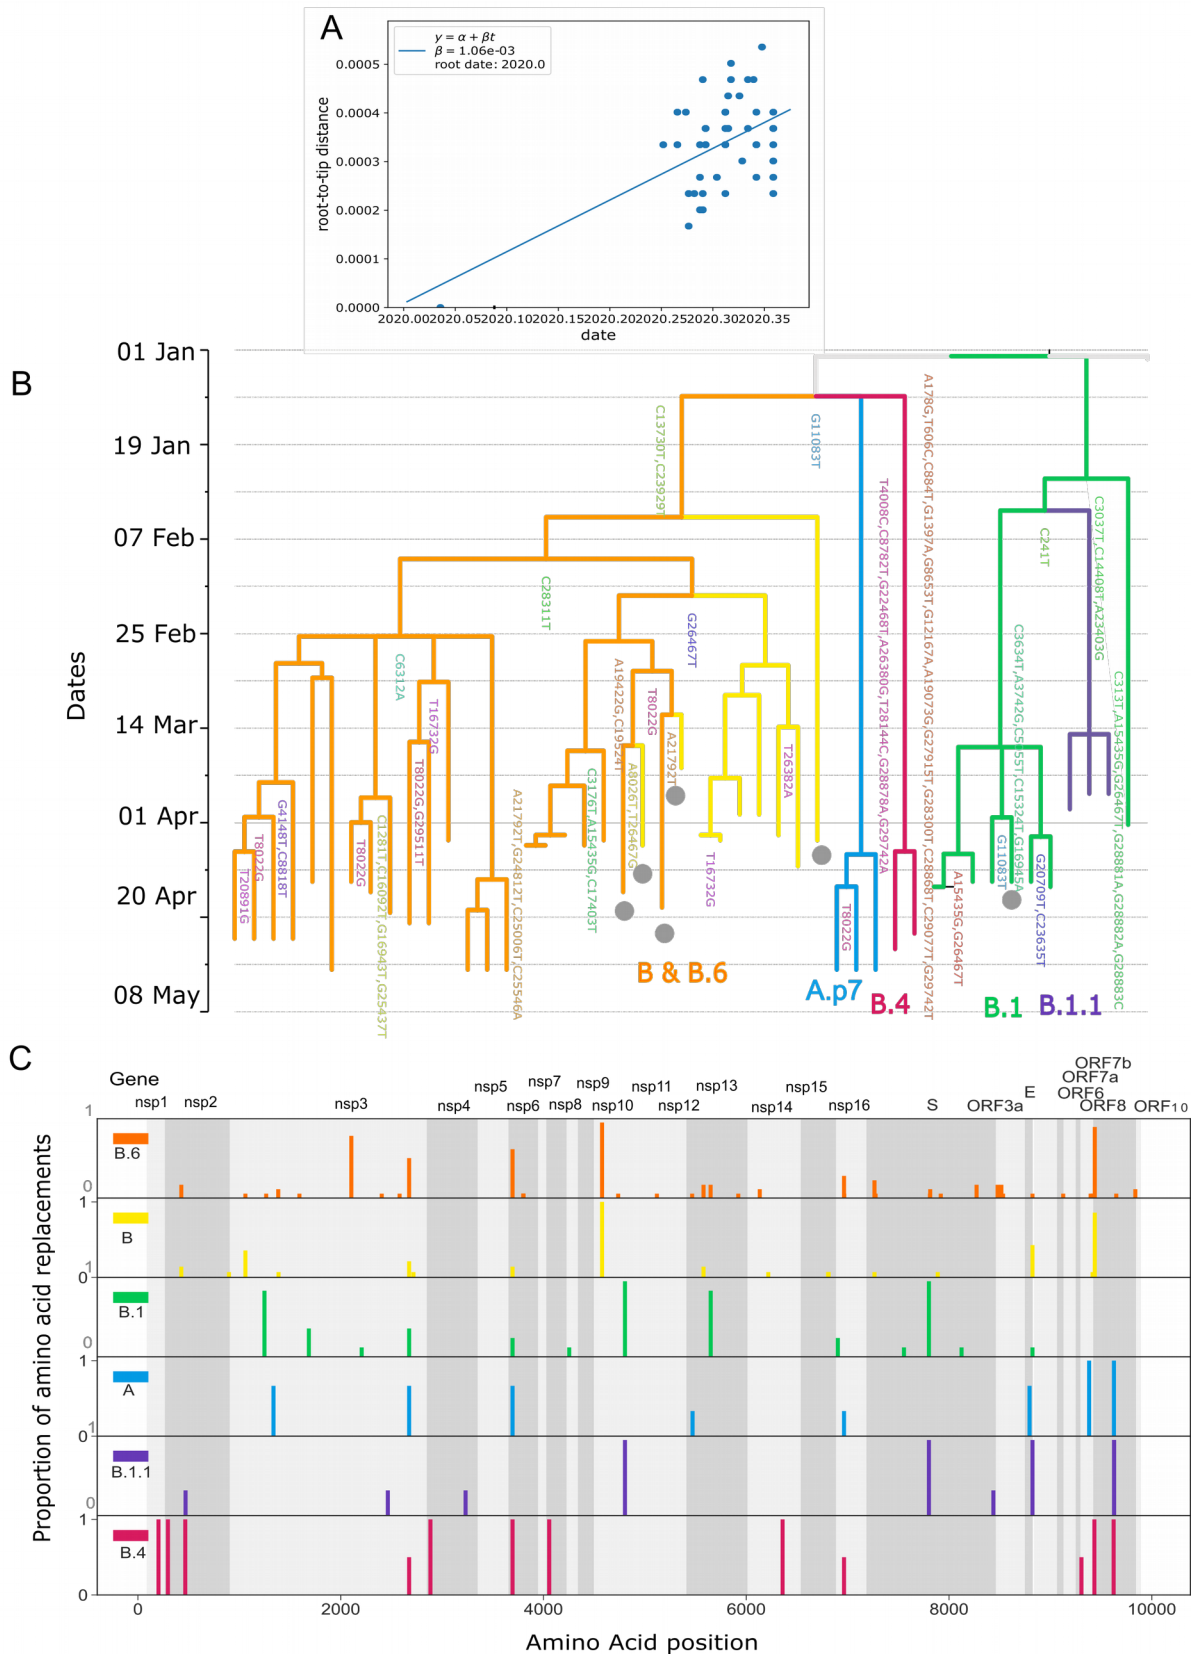

Supplementary Figure 2- **A**. Root to tip regression analysis of sequences used in this study. Mutation rate is estimated at  $1.062e-03$  mutations/site/year with  $r^2 = 0.28$ . Note: While the temporal signal in this data is weak, analysis of larger datasets by others is suggestive of a molecular clock. **B**. Time scaled maximum likelihood tree of genomes from this study. Coloured circles represent sequences from symptomatic individuals. Mutations/SNPs at each node are labelled in the tree. All changes are with respect to the reference genome. **C**. Frequency of amino acid replacements in different lineages. Details are provided in Supplementary Table 3

## Supplementary Table 2

| Supplementary Table 2: Frequency of SNPs in different lineages |         |      |      |      |       |      |      |
|----------------------------------------------------------------|---------|------|------|------|-------|------|------|
| Sr. No                                                         | SNP     | A    | B    | B.1  | B.1.1 | B.4  | B.6  |
| 48                                                             | C16092T |      |      |      |       |      | 0.18 |
| 49                                                             | G16396A |      |      |      |       |      | 0.59 |
| 50                                                             | A16408G | 0.33 |      |      |       |      |      |
| 51                                                             | T16732G |      | 0.14 |      |       |      | 0.18 |
| 52                                                             | G16943T |      |      |      |       |      | 0.18 |
| 53                                                             | G16945A |      |      | 0.88 |       |      |      |
| 54                                                             | C17403T |      | 0.36 |      |       |      | 0.59 |
| 55                                                             | C17762G |      |      |      |       |      | 0.59 |
| 56                                                             | G18397T |      |      |      |       |      | 0.12 |
| 57                                                             | G18651T |      | 0.71 |      |       |      |      |
| 58                                                             | A19073G |      |      |      |       | 1.00 |      |
| 59                                                             | A19422G |      | 0.50 |      |       |      | 0.59 |
| 60                                                             | C19524T |      | 0.50 |      |       |      | 0.59 |
| 61                                                             | G20419T |      | 0.71 |      |       |      |      |
| 62                                                             | A20435G |      | 0.71 |      |       |      |      |
| 63                                                             | G20709T |      |      | 0.25 |       |      |      |
| 64                                                             | T20891G | 0.33 |      |      |       | 0.50 | 0.29 |
| 65                                                             | A20895T |      |      |      |       |      | 0.59 |
| 66                                                             | C20896G |      |      |      |       |      | 0.59 |
| 67                                                             | A21792T |      | 0.71 |      |       |      | 0.24 |
| 68                                                             | G21824C |      |      |      |       |      | 0.59 |
| 69                                                             | G22468T | 1.00 |      |      |       |      |      |
| 70                                                             | T22665C |      |      | 0.13 |       |      |      |
| 71                                                             | C23320T |      | 0.71 |      |       |      |      |
| 72                                                             | A23403G |      |      | 1.00 | 1.00  |      |      |
| 73                                                             | T23431A |      |      |      |       |      | 0.59 |
| 74                                                             | T23433C |      |      |      |       |      | 0.59 |
| 75                                                             | G23441C |      |      |      |       |      | 0.12 |
| 76                                                             | A23442C |      |      |      |       |      | 0.59 |
| 77                                                             | C23635T |      |      | 0.25 |       |      |      |
| 78                                                             | G23663T |      | 0.71 |      |       |      |      |
| 79                                                             | G23755T |      |      |      |       |      | 0.59 |
| 80                                                             | C23929T |      | 0.86 |      |       |      | 0.82 |
| 81                                                             | G24368C |      |      | 0.13 |       |      |      |
| 82                                                             | G24812T |      |      |      |       |      | 0.18 |
| 83                                                             | C25006T |      |      |      |       |      | 0.18 |
| 84                                                             | G25311T |      |      |      | 0.33  |      |      |
| 85                                                             | G25437T |      |      |      |       |      | 0.12 |
| 86                                                             | C25546A |      |      |      |       |      | 0.18 |
| 87                                                             | C25584T |      |      | 0.13 |       |      |      |
| 88                                                             | G25598A |      |      |      |       |      | 0.59 |
| 89                                                             | G26211T | 0.33 |      |      |       |      |      |
| 90                                                             | A26380G | 0.67 |      |      |       |      |      |
| 91                                                             | T26382A |      | 0.14 |      | 0.33  |      | 0.59 |
| 92                                                             | T26397C |      |      |      |       |      | 0.59 |
| 93                                                             | G26467T |      | 0.43 | 0.13 | 1.00  |      | 0.59 |
| 94                                                             | C26753T |      | 0.71 |      |       |      |      |
| 95                                                             | C26801T |      | 0.71 |      |       |      |      |

Supplementary Table 2: Frequency of SNPs in different lineages

| Sr. No | SNP     | A    | B    | B.1  | B.1.1 | B.4  | B.6  |
|--------|---------|------|------|------|-------|------|------|
| 48     | C16092T |      |      |      |       |      | 0.18 |
| 49     | G16396A |      |      |      |       |      | 0.59 |
| 50     | A16408G | 0.33 |      |      |       |      |      |
| 51     | T16732G |      | 0.14 |      |       |      | 0.18 |
| 52     | G16943T |      |      |      |       |      | 0.18 |
| 53     | G16945A |      |      | 0.88 |       |      |      |
| 54     | C17403T |      | 0.36 |      |       |      | 0.59 |
| 55     | C17762G |      |      |      |       |      | 0.59 |
| 56     | G18397T |      |      |      |       |      | 0.12 |
| 57     | G18651T |      | 0.71 |      |       |      |      |
| 58     | A19073G |      |      |      |       | 1.00 |      |
| 59     | A19422G |      | 0.50 |      |       |      | 0.59 |
| 60     | C19524T |      | 0.50 |      |       |      | 0.59 |
| 61     | G20419T |      | 0.71 |      |       |      |      |
| 62     | A20435G |      | 0.71 |      |       |      |      |
| 63     | G20709T |      |      | 0.25 |       |      |      |
| 64     | T20891G | 0.33 |      |      |       | 0.50 | 0.29 |
| 65     | A20895T |      |      |      |       |      | 0.59 |
| 66     | C20896G |      |      |      |       |      | 0.59 |
| 67     | A21792T |      | 0.71 |      |       |      | 0.24 |
| 68     | G21824C |      |      |      |       |      | 0.59 |
| 69     | G22468T | 1.00 |      |      |       |      |      |
| 70     | T22665C |      |      | 0.13 |       |      |      |
| 71     | C23320T |      | 0.71 |      |       |      |      |
| 72     | A23403G |      |      | 1.00 | 1.00  |      |      |
| 73     | T23431A |      |      |      |       |      | 0.59 |
| 74     | T23433C |      |      |      |       |      | 0.59 |
| 75     | G23441C |      |      |      |       |      | 0.12 |
| 76     | A23442C |      |      |      |       |      | 0.59 |
| 77     | C23635T |      |      | 0.25 |       |      |      |
| 78     | G23663T |      | 0.71 |      |       |      |      |
| 79     | G23755T |      |      |      |       |      | 0.59 |
| 80     | C23929T |      | 0.86 |      |       |      | 0.82 |
| 81     | G24368C |      |      | 0.13 |       |      |      |
| 82     | G24812T |      |      |      |       |      | 0.18 |
| 83     | C25006T |      |      |      |       |      | 0.18 |
| 84     | G25311T |      |      |      | 0.33  |      |      |
| 85     | G25437T |      |      |      |       |      | 0.12 |
| 86     | C25546A |      |      |      |       |      | 0.18 |
| 87     | C25584T |      |      | 0.13 |       |      |      |
| 88     | G25598A |      |      |      |       |      | 0.59 |
| 89     | G26211T | 0.33 |      |      |       |      |      |
| 90     | A26380G | 0.67 |      |      |       |      |      |
| 91     | T26382A |      | 0.14 |      | 0.33  |      | 0.59 |
| 92     | T26397C |      |      |      |       |      | 0.59 |
| 93     | G26467T |      | 0.43 | 0.13 | 1.00  |      | 0.59 |
| 94     | C26753T |      | 0.71 |      |       |      |      |
| 95     | C26801T |      | 0.71 |      |       |      |      |

| Supplementary Table 2: Frequency of SNPs in different lineages                                                                                                                                                                                                                                                                                                                       |         |      |      |     |       |      |      |
|--------------------------------------------------------------------------------------------------------------------------------------------------------------------------------------------------------------------------------------------------------------------------------------------------------------------------------------------------------------------------------------|---------|------|------|-----|-------|------|------|
| Sr. No                                                                                                                                                                                                                                                                                                                                                                               | SNP     | A    | B    | B.1 | B.1.1 | B.4  | B.6  |
| 96                                                                                                                                                                                                                                                                                                                                                                                   | G27378T |      |      |     |       |      | 0.59 |
| 97                                                                                                                                                                                                                                                                                                                                                                                   | G27915T |      |      |     |       | 0.50 |      |
| 98                                                                                                                                                                                                                                                                                                                                                                                   | T28144C | 1.00 |      |     |       |      |      |
| 99                                                                                                                                                                                                                                                                                                                                                                                   | G28188C |      |      |     |       |      | 0.59 |
| 100                                                                                                                                                                                                                                                                                                                                                                                  | A28247C |      | 0.71 |     |       |      |      |
| 101                                                                                                                                                                                                                                                                                                                                                                                  | A28249G |      |      |     |       |      | 0.59 |
| 102                                                                                                                                                                                                                                                                                                                                                                                  | G28300T |      |      |     |       | 1.00 |      |
| 103                                                                                                                                                                                                                                                                                                                                                                                  | C28311T |      | 0.86 |     |       |      | 0.88 |
| 104                                                                                                                                                                                                                                                                                                                                                                                  | T28688C |      |      |     |       | 0.50 |      |
| 105                                                                                                                                                                                                                                                                                                                                                                                  | C28868T |      |      |     |       | 1.00 |      |
| 106                                                                                                                                                                                                                                                                                                                                                                                  | G28878A | 1.00 |      |     |       |      |      |
| 107                                                                                                                                                                                                                                                                                                                                                                                  | G28881A |      |      |     | 1.00  |      |      |
| 108                                                                                                                                                                                                                                                                                                                                                                                  | G28882A |      |      |     | 1.00  |      |      |
| 109                                                                                                                                                                                                                                                                                                                                                                                  | G28883C |      |      |     | 1.00  |      |      |
| 110                                                                                                                                                                                                                                                                                                                                                                                  | G28946T |      |      |     |       |      | 0.59 |
| 111                                                                                                                                                                                                                                                                                                                                                                                  | C29077T |      |      |     |       | 1.00 |      |
| 112                                                                                                                                                                                                                                                                                                                                                                                  | G29511T |      |      |     |       |      | 0.59 |
|                                                                                                                                                                                                                                                                                                                                                                                      |         |      |      |     |       |      |      |
| <p>Supplementary Table 2: Frequency of SNPs in different lineages<br/>           Single nucleotide polymorphisms were identified in the genomes with respect to the reference sequence. The frequency of SNPs within each lineage was calculated by the number of sequences with SNP/total number of sequences in the lineage. SNPs are ordered by their position on the genome.</p> |         |      |      |     |       |      |      |

Supplementary Table 3

| Sr. No | Amino Acid Replacements<br>(Gene – change) | Proportion of amino acid replacements by lineage |      |      |       |      |      |
|--------|--------------------------------------------|--------------------------------------------------|------|------|-------|------|------|
|        |                                            | A                                                | B    | B.1  | B.1.1 | B.4  | B.6  |
| 1      | E-I46V                                     | 0.67                                             |      |      |       |      |      |
| 2      | E-V75F                                     |                                                  | 0.43 | 0.13 | 1.00  |      | 0.59 |
| 3      | N-D225Y                                    |                                                  |      |      |       |      | 0.59 |
| 4      | N-G204R                                    |                                                  |      |      | 1.00  |      |      |
| 5      | N-P13L                                     |                                                  | 0.86 |      |       |      | 0.94 |
| 6      | N-P199S                                    |                                                  |      |      |       | 1.00 |      |
| 7      | N-Q9H                                      |                                                  |      |      |       | 1.00 |      |
| 8      | N-R203K                                    |                                                  |      |      | 1.00  |      |      |
| 9      | N-S202N                                    | 1.00                                             |      |      |       |      |      |
| 10     | N-S413I                                    |                                                  |      |      |       |      | 0.12 |
| 11     | ORF3a-L15F                                 |                                                  |      |      |       |      | 0.18 |
| 12     | ORF3a-L52I                                 |                                                  |      |      |       |      | 0.18 |
| 13     | ORF3a-W69*                                 |                                                  |      |      |       |      | 0.59 |
| 14     | ORF6-E59D                                  |                                                  |      |      |       |      | 0.59 |
| 15     | ORF8-D119G                                 |                                                  |      |      |       |      | 0.59 |
| 16     | ORF8-G8*                                   |                                                  |      |      |       | 0.50 |      |
| 17     | ORF8-L118F                                 |                                                  | 0.71 |      |       |      |      |
| 18     | ORF8-L84S                                  | 1.00                                             |      |      |       |      |      |
| 19     | ORF8-V99L                                  |                                                  |      |      |       |      | 0.59 |
| 20     | S-A701S                                    |                                                  | 0.71 |      |       |      |      |
| 21     | S-C1250F                                   |                                                  |      |      | 0.33  |      |      |
| 22     | S-D1084Y                                   |                                                  |      |      |       |      | 0.18 |
| 23     | S-D614G                                    |                                                  |      | 1.00 | 1.00  |      |      |
| 24     | S-D627H                                    |                                                  |      |      |       |      | 0.59 |
| 25     | S-D627P                                    |                                                  |      |      |       |      | 0.59 |
| 26     | S-D88H                                     |                                                  |      |      |       |      | 0.59 |
| 27     | S-D936H                                    |                                                  |      | 0.13 |       |      |      |
| 28     | S-I624T                                    |                                                  |      |      |       |      | 0.59 |
| 29     | S-K77M                                     |                                                  | 0.71 |      |       |      | 0.24 |
| 30     | S-L368P                                    |                                                  |      | 0.13 |       |      |      |
| 31     | S-M731I                                    |                                                  |      |      |       |      | 0.59 |
| 32     | nsp1-I114T                                 |                                                  |      |      |       | 1.00 |      |
| 33     | nsp12-A97V                                 |                                                  | 1.00 |      |       |      | 1.00 |
| 34     | nsp12-H256P                                |                                                  |      |      |       |      | 0.59 |
| 35     | nsp12-L638F                                |                                                  |      |      |       |      | 0.59 |
| 36     | nsp12-P323L                                |                                                  |      | 1.00 | 1.00  |      |      |
| 37     | nsp13-A237T                                |                                                  |      | 0.88 |       |      |      |
| 38     | nsp13-A509G                                |                                                  |      |      |       |      | 0.59 |
| 39     | nsp13-G54S                                 |                                                  |      |      |       |      | 0.59 |
| 40     | nsp13-S166A                                |                                                  | 0.14 |      |       |      | 0.18 |
| 41     | nsp13-S236I                                |                                                  |      |      |       |      | 0.18 |
| 42     | nsp13-T58A                                 | 0.33                                             |      |      |       |      |      |
| 43     | nsp14-D345G                                |                                                  |      |      |       | 1.00 |      |
| 44     | nsp14-E204D                                |                                                  | 0.71 |      |       |      |      |
| 45     | nsp14-V120L                                |                                                  |      |      |       |      | 0.12 |
| 46     | nsp15-D267Y                                |                                                  | 0.71 |      |       |      |      |
| 47     | nsp15-D272G                                |                                                  | 0.71 |      |       |      |      |
| 48     | nsp16-M17I                                 |                                                  |      | 0.25 |       |      |      |



| Sr. No | Amino Acid Replacements<br>(Gene – change) | Proportion of amino acid replacements by lineage |      |      |       |      |      |
|--------|--------------------------------------------|--------------------------------------------------|------|------|-------|------|------|
|        |                                            | A                                                | B    | B.1  | B.1.1 | B.4  | B.6  |
| 49     | nsp16-P80A                                 |                                                  |      |      |       |      | 0.59 |
| 50     | nsp16-V78G                                 | 0.33                                             |      |      |       | 0.50 | 0.29 |
| 51     | nsp2-A159V                                 |                                                  | 0.14 |      |       |      | 0.18 |
| 52     | nsp2-E201D                                 |                                                  |      |      | 0.33  |      |      |
| 53     | nsp2-R27C                                  |                                                  |      |      |       | 1.00 |      |
| 54     | nsp2-T629T/I                               |                                                  | 0.71 |      |       |      |      |
| 55     | nsp2-V198I                                 |                                                  |      |      |       | 1.00 |      |
| 56     | nsp3-A358S                                 |                                                  |      |      |       |      | 0.59 |
| 57     | nsp3-A480V                                 |                                                  | 0.71 |      |       |      |      |
| 58     | nsp3-D1674N                                |                                                  |      |      |       |      | 0.59 |
| 59     | nsp3-F430S                                 | 0.33                                             |      |      |       |      |      |
| 60     | nsp3-F430S/F                               | 0.33                                             |      |      |       |      |      |
| 61     | nsp3-G1300C                                |                                                  |      | 0.13 |       |      |      |
| 62     | nsp3-I341M                                 |                                                  |      | 0.88 |       |      |      |
| 63     | nsp3-P153S                                 |                                                  | 0.36 |      |       |      | 0.59 |
| 64     | nsp3-P1558P/L                              |                                                  |      |      | 0.33  |      |      |
| 65     | nsp3-T1198K                                |                                                  |      |      |       |      | 0.82 |
| 66     | nsp3-T686I                                 |                                                  |      |      |       |      | 0.59 |
| 67     | nsp3-T779I                                 |                                                  |      | 0.38 |       |      |      |
| 68     | nsp3-V1768G                                | 0.67                                             | 0.21 | 0.38 |       | 0.50 | 0.53 |
| 69     | nsp3-V1811A                                |                                                  | 0.71 |      |       |      |      |
| 70     | nsp3-V477F                                 |                                                  |      |      |       |      | 0.12 |
| 71     | nsp3-W1498R                                |                                                  |      |      |       |      | 0.59 |
| 72     | nsp4-A380V                                 |                                                  |      |      | 0.33  |      |      |
| 73     | nsp4-M33I                                  |                                                  |      |      |       | 1.00 |      |
| 74     | nsp6-L142V                                 |                                                  |      |      |       |      | 0.59 |
| 75     | nsp6-L37F                                  | 0.67                                             | 0.14 | 0.25 |       | 1.00 | 0.65 |
| 76     | nsp6-M143M/L                               |                                                  |      |      |       |      | 0.59 |
| 77     | nsp6-V145L                                 |                                                  |      |      |       |      | 0.59 |
| 78     | nsp8-V26I                                  |                                                  |      |      |       | 1.00 |      |
| 79     | nsp9-D25E                                  |                                                  |      | 0.13 |       |      |      |

## Supplementary Table 4

| Supplementary Table 4: Description of contact clusters |       |            |           |
|--------------------------------------------------------|-------|------------|-----------|
|                                                        |       | Our Centre |           |
|                                                        | State | tested     | sequenced |
| Total No of contact clusters                           | 104   | 38         | 12        |
| Total No. of people connected                          | 822   | 398        | 294       |
| No of people in a cluster                              |       |            |           |
| 0–5                                                    | 74    | 22         | 2         |
| >5                                                     | 30    | 16         | 10        |
| Nature of contact/exposure of index case*              |       |            |           |
| Contact with COVID19 case                              | 0     | 0          | 0         |
| No known Contact                                       |       |            |           |
| i. Travel History (International)                      | 14    | 0          | 0         |
| ii. Travel History (Domestic)                          | 20    | 10         | 5         |
| iii.ILI (under investigation)                          | 19    | 4          | 0         |
| iv.SARI (under investigation)                          | 29    | 9          | 6         |
| v.Under Investigation                                  | 10    | 8          | 1         |
| vi.Contact Unknown                                     | 12    | 7          | 0         |
| Clinical state of index case*                          |       |            |           |
| Asymptomatic(Asymp)                                    | 29    | 19         | 3         |
| Symptomatic (Symp)                                     | 75    | 19         | 9         |
| Ratio (Asymp: Symp)                                    | 0.39  | 1.00       | 0.33      |
| Nature of contact/exposure of spreader**               |       |            |           |
| Contact with COVID19 case                              | 12    | 4          | 3         |
| No known Contact                                       |       |            |           |
| i. Travel History (International)                      | 14    | 0          | 0         |
| ii. Travel History (Domestic)                          | 16    | 9          | 4         |
| iii.ILI (under investigation)                          | 19    | 4          | 0         |
| iv.SARI (under investigation)                          | 22    | 7          | 4         |
| v.Under Investigation                                  | 10    | 8          | 1         |
| vi.Contact Unknown                                     | 11    | 6          | 0         |
| Clinical state of spreader**                           |       |            |           |
| Asymptomatic(Asymp)                                    | 35    | 20         | 4         |
| Symptomatic (Symp)                                     | 69    | 18         | 8         |
| Ratio (Asymp: Symp)                                    | 0.51  | 1.11       | 0.50      |

\* earliest detected individual from a cluster, \*\* individual with maximum number of connections in a cluster, 'asymptomatic at the time of sampling

*Note: Nature of contact/exposure is classified as Contact with COVID19 case- where tested individual was in contact with a known positive case or No known contact, divided into six categories. i. Travel history (international) - travel history to other countries, ii. Travel history (domestic) - travel within the state or interstate, iii. ILI (under investigation) - individuals with Influenza like illness with no known source of infection, iv. SARI (under investigation) - individuals with severe acute respiratory infection where the source of infection is not known, v. Under investigation- source of infection is not yet known/ contact tracing has not been completed, vi. Contact Unknown- where the tested individual was from a location where there were cases (eg. A containment Zone) but a specific contact could not be identified.*

## Supplementary Table 5

| Supplementary Table 5: Characteristics of sequenced clusters |          |              |                  |       |       |       |        |                |      |                                      |
|--------------------------------------------------------------|----------|--------------|------------------|-------|-------|-------|--------|----------------|------|--------------------------------------|
| Clusters                                                     | # people | Lineages     | Age Distribution |       |       |       |        | Clinical State |      | Districts                            |
|                                                              |          |              | 0-20             | 20-40 | 40-60 | 60-80 | 80-100 | Asym*          | Symp |                                      |
| C1                                                           | 67       | B.1.1 (3)    | 7                | 46    | 11    | 3     | 0      | 51             | 16   | Mysuru (57),Vijayapura (8),Mandya(2) |
| C2                                                           | 43       | B.6(1), B(1) | 10               | 18    | 13    | 2     | 0      | 39             | 4    | Belagavi(41),Tumkur(2)               |
| C3                                                           | 50       | B.4(2), B(1) | 10               | 37    | 2     | 1     | 0      | 48             | 2    | Bengaluru Urban (49), Davanagere (1) |
| C4                                                           | 35       | B.1(7)       | 4                | 23    | 7     | 0     | 1      | 32             | 3    | Bengaluru Urban (35)                 |
| C5                                                           | 21       | B.6(4)       | 4                | 10    | 5     | 2     | 0      | 20             | 1    | Bagalkot(21)                         |
| C6                                                           | 27       | B.6(3)       | 7                | 14    | 5     | 1     | 0      | 26             | 1    | Mandya(20), Mysuru(5), Kalaburgi(2)  |
| C7                                                           | 18       | B(6), B.6(3) | 1                | 9     | 8     | 0     | 0      | 18             | 0    | Bengaluru Urban(18)                  |
| C8                                                           | 16       | B.6(1)       | 3                | 6     | 5     | 1     | 1      | 14             | 2    | Bidar(16)                            |
| C9                                                           | 7        | B(1)         | 4                | 0     | 2     | 1     | 0      | 6              | 1    | Bengaluru urban(7)                   |
| C10                                                          | 6        | B(1)         | 1                | 4     | 1     | 0     | 0      | 5              | 1    | Belagavi(6)                          |
| C11                                                          | 2        | B.6(1)       | 1                | 1     | 0     | 0     | 0      | 2              | 0    | Bidar(2)                             |
| C12                                                          | 2        | B(1)         | 1                | 1     | 0     | 0     | 0      | 1              | 1    | Belagavi(2)                          |
